# Supplementary material
Source: PubMed Central journal article supplement (PMC7269807)
Supplement: NIHMS1581339-supplement-2.pdf [file NIHMS1581339-supplement-2.pdf]

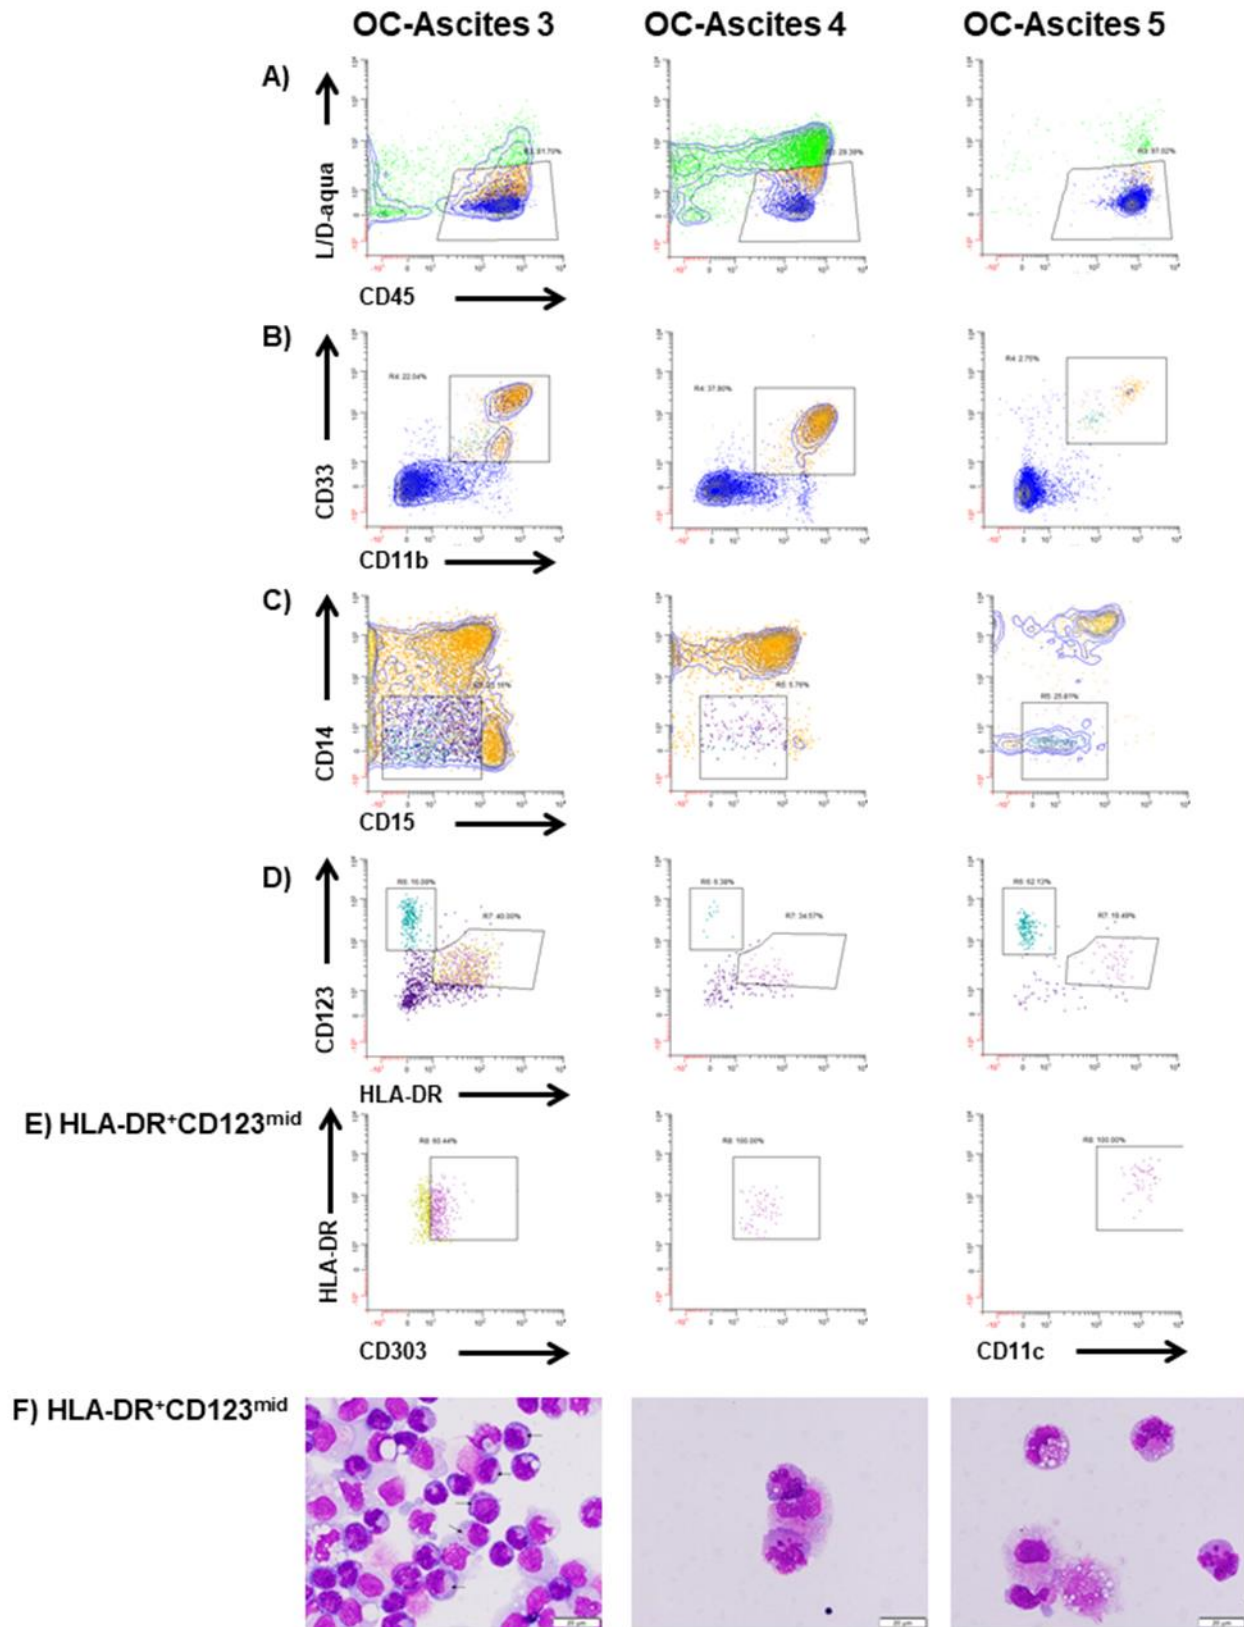

**Supplemental Figure S1: CD33<sup>+</sup>CD11b<sup>+</sup>CD14<sup>-</sup>CD15<sup>-</sup> fraction of OC ascites cells contains variable proportions of HLA-DR<sup>+</sup>CD123<sup>mid</sup> dendritic cells.** Frozen ascites cells collected from patients with OC (n=3) prior to surgery were analyzed for HLA-DR<sup>+</sup>CD123<sup>+/mid</sup> myeloid cells. Non-aggregate and viable (L/D-aqua<sup>-</sup>) CD45<sup>+</sup> cells (**A**) were gated to get CD11b<sup>+</sup>CD33<sup>+</sup> fractions (**B**) and those cells were gated on CD15<sup>-</sup>CD14<sup>-</sup> fractions (C). Those cells were gated to obtain CD123<sup>+/mid</sup>HLA-DR<sup>+</sup> (**D**) and these cells were gated to obtain CD303<sup>+</sup> or CD11c<sup>+</sup> cells (**E**). CD123<sup>mid</sup>HLA-DR<sup>+</sup> cells in CD45<sup>+</sup>CD33<sup>+</sup>CD11b<sup>+</sup>CD14<sup>-</sup>CD15<sup>-</sup> fraction of ascites cells were sort-purified and analyzed by cytology (**F**). Representative images show that sort-purified CD123<sup>mid</sup>HLA-DR<sup>+</sup> cells are comprised of medium-sized mononuclear cells with eccentrically located nuclei, mature-appearing chromatin, moderate amounts of basophilic cytoplasm without overt dendritic processes. Irregularity in the nuclear contour may be artefactual secondary to cytopsin preparation, freezing and thawing, or both. Some cells demonstrate pale-staining Golgi zones (arrows), imparting a plasmacytoid morphology. The surface markers and morphology of these sort-purified cells are suggestive of dendritic cells. (Wright-Giemsa staining, 1000X).
